# Supplementary material for: ANT2 drives proinflammatory macrophage activation in obesity
Source: PubMed Central journal article supplement (PMC8564915; doi:10.1172/jci.insight.147033), 2021-10-22

## Supplementary Figure Legends

**Supplementary Figure 1. Generation of myeloid-specific ANT2 KO mice.** (A) mRNA expression of *Ant1* and *Ant2* in bone marrow-derived monocytes of WT and ANT2 MKO mice (n=4 mice/group). (B) *Ant2* mRNA expression in bone marrow-derived monocytes isolated from WT and ANT2 MKO mice during M-CSF-induced macrophage differentiation (n=3 mice/group). (C) mRNA expression of *Ant1* and *Ant2* in BMDMs of WT and ANT2 MKO mice (n=4 wells/group). (D) *Ant2* mRNA expression in eWAT (left; n=6 mice/group) and primary adipocytes (middle; n=6 mice/group) and SVCs (right; n=3 mice/group) isolated from eWAT of WT and ANT2 MKO mice. (E) mRNA expression of *Ant1* and *Ant2* in ATMs isolated from eWAT of WT and ANT2 MKO mice (n=4 mice/group). (F) mRNA expression of *Ant1* and *Ant2* in whole brain of WT and ANT2 MKO mice (n=6 mice/group). (G) Semi-quantitative PCR analysis of *Ant2* exon2 and 3 deletion in genomic DNAs purified from whole brain of WT and ANT2 MKO mice. Schematic diagram of the genomic DNA PCR strategy is illustrated on top. (H) Body weight of NCD WT and ANT2 MKO mice (n=5 WT and 5 KO mice). (I) eWAT Mass of NCD WT and ANT2 MKO mice (n=5 WT and 5 KO mice). (J) Average adipocyte size in eWAT of WT and ANT2 MKO mice (n=5 WT and 5 KO mice). (K) Liver Mass of NCD WT and ANT2 MKO mice (n=5 WT and 5 KO mice). (L) H & E staining of eWAT sections of NCD WT and ANT2 MKO mice. eWAT samples harvested from 5 WT and 5 KO individual mice were analyzed and representative pictures are shown. (M) H & E staining of liver sections of NCD WT and ANT2 MKO mice. Representative pictures are shown. eWAT samples harvested from 5 WT and 5 KO individual mice were analyzed and representative pictures are shown. (N) OGTT in NCD WT and ANT2 MKO mice (n=6 WT and 8 KO mice). (O) Fasting (6h) plasma insulin levels in NCD WT and ANT2 MKO mice (n=6 WT and 8 KO mice). (P) Body weight changes after HFD in WT and ANT2

MKO NCD WT and ANT2 MKO mice (n=6 WT and 8 KO mice). \* $P$ <0.05; \*\* $P$ <0.01; \*\*\* $P$ <0.001; all error bars represent SEM.

**Supplementary Figure 2. Insulin-stimulated Akt phosphorylation in liver, skeletal muscle, and eWAT of HFD WT and ANT2 MKO mice.** (A) Western blot analysis of total and phosphorylated (Ser473) Akt was performed in total lysates of liver, skeletal muscle (quadriceps), and eWAT of HFD WT and ANT2 MKO mice. (B) Relative band intensity in panel A was measured, plotted, and presented.

**Supplementary Figure 3. ANT2 depletion does not affect myeloid development or macrophage differentiation, and obesity induced increased *Ant2* expression in ATMs.** (A-B) Flow cytometry analysis of the time course changes in macrophage differentiation of hematopoietic stem cells isolated from WT and ANT2 KO mice, stimulated by M-CSF *in vitro* (A). The proportion of CD11b<sup>+</sup> F4/80<sup>+</sup> macrophages during the course of BMDM differentiation is plotted in panel B (n=3 wells/time point). (C-E) Flow cytometry analysis of myeloid cells in spleen (C-left and E) and mesenteric lymph node (C-right and D) of WT and ANT2 MKO mice. The proportion of each of myeloid subsets is plotted in panel C (n= 5 mice/group). (F) Gating strategy for the flow cytometry analysis in Figure 2C. (G-H) Flow cytometry analysis of different CD4<sup>+</sup> T cell subsets in HFD WT and ANT2 MKO mice (n= 7 mice per group). (G) The proportion of different CD4<sup>+</sup> T cell subsets among total SVCs are plotted and presented. (H) Gating strategy for different CD4<sup>+</sup> T cell subsets. (I-N) Single cell RNA-seq analysis of *Ant2* expression in different subsets of adipose tissue macrophages and monocytes. UMAP projections of identified graph-based adipose tissue macrophage (I) and monocyte (J) clusters from scRNA-seq data derived from CD45<sup>+</sup> cells sorted from the stromal vascular fraction of eWATs of NCD and HFD WT mice are shown in

panels of I and J. k-nearest neighbor graph algorithm was applied to identify 6 clusters of adipose tissue macrophages and monocytes as illustrated and color-coded in panel I. Distribution and expression levels of *Ant2* in each of the adipose tissue macrophages (L) and monocytes (N) are presented as heat maps in panels L and N. Expression levels of *Ant2* in different ATM subsets expressing *Itgax*<sup>+</sup> (encoding CD11c) and *Cd9*<sup>+</sup> are plotted in a bar graph (M). n= 4 NCD and 4 HFD (18 weeks) mice. (O) *Ant1* and *Ant2* mRNA expression in WT BMDMs treated with or without LPS or IL-4/IL-13 for 24h (n=4 wells/group). (P) mRNA expression of *Ant1* and *Ant1* in ATMs isolated from NCD and HFD WT mice (n=4 mice/group). \**P* < 0.05, \*\**P* < 0.01; all error bars represent SEM.

**Supplementary Figure 4. Analysis of WT and ANT2 KO BMDMs.** (A) Gating strategy for the flow cytometry analysis of BMDMs treated with or without LPS. (B) Quantitative changes in TLR2, TLR4, and TRAF6 expression relative to actin expression in Figure 4F Western blot images were calculated and plotted. (C) mRNA expression of TLRs and downstream signaling molecules in WT and ANT2 KO BMDMs (n=4 wells/group). (D) Western blot analysis of TRAF6 expression in the cytoplasmic and mitochondrial fraction of WT and ANT2 KO BMDMs treated with or without for 6 h. (E) Quantitative changes in the protein expression relative to GAPDH expression in panel D images were calculated and plotted.

**Supplementary Figure 5. Gating strategies for flow cytometry analysis of ATMs.** (A) Gating strategy for flow cytometry analysis of ATMs in Figure 5B. (B) mRNA expression of chemokine receptor genes in WT and ANT2 KO monocytes. \**P* < 0.05, \*\**P* < 0.01; all error bars represent SEM. (C) Gating strategy for flow cytometry analysis of ATMs in Figures 5C, 5D, and 5E.

**Supplementary Figure 6. OCR, PGC1 $\alpha$  expression, and mitophagy in WT and ANT2**

**KO BMDMs treated with or without LPS or PA. (A)** Basal OCR was measured in WT and ANT2 KO BMDMs treated with or without LPS for 24h, in the presence or absence of acute PA treatment (n= 5 wells/group). **(B)** Oligomycin-insensitive (uncoupled) OCR in WT and ANT2 KO BMDMs treated with or without LPS for 24h, in the presence or absence of acute PA treatment (n= 5 wells/group). **(C)** PGC-1 $\alpha$  expression in WT and ANT2 KO BMDMs treated with PA or LPS for 24h. **(D)** Quantitative measurement of mitophagy using mtKeima-red in WT and ANT2 KO BMDMs treated with or without LPS for 24. Representative pictures are shown on the left. The ratio between red and green fluorescence was calculated and plotted on the right. **(E)** Electron microscopy analysis of autophagosome formation in WT and ANT2 KO BMDMs treated with or without PA or LPS for 24h. Representative pictures are shown on the left. The number of autophagosome in a given cellular area is plotted on the right. \* $P < 0.05$ , \*\* $P < 0.01$ , \*\*\* $P < 0.001$ ; all error bars represent SEM.

**Supplementary Figure 7. Relative band intensity in the Western blot images in Figure 7D.**

**Supplementary Figure 8. Inflammatory and mitophagic protein expression in WT and ANT2 KO BMDMs. (A)** Relative band intensity of the Western blot images in Figure 8A. **(B)** Western blot analysis of inflammatory and mitophagic protein expression in WT and ANT2 KO BMDMs treated with or without PA or LPS, in the presence or absence of MitoTEMPO for 30 min. **(C)** Relative band intensity of the Western blot images in Figure 8C. **(D)** Western

blot analysis of HIF-1 $\alpha$  in WT and ANT2 KO BMDMs treated with or without H<sub>2</sub>O<sub>2</sub> for 1 or 4h.

**(E)** Relative band intensity of the Western blot images in Figure 8F.

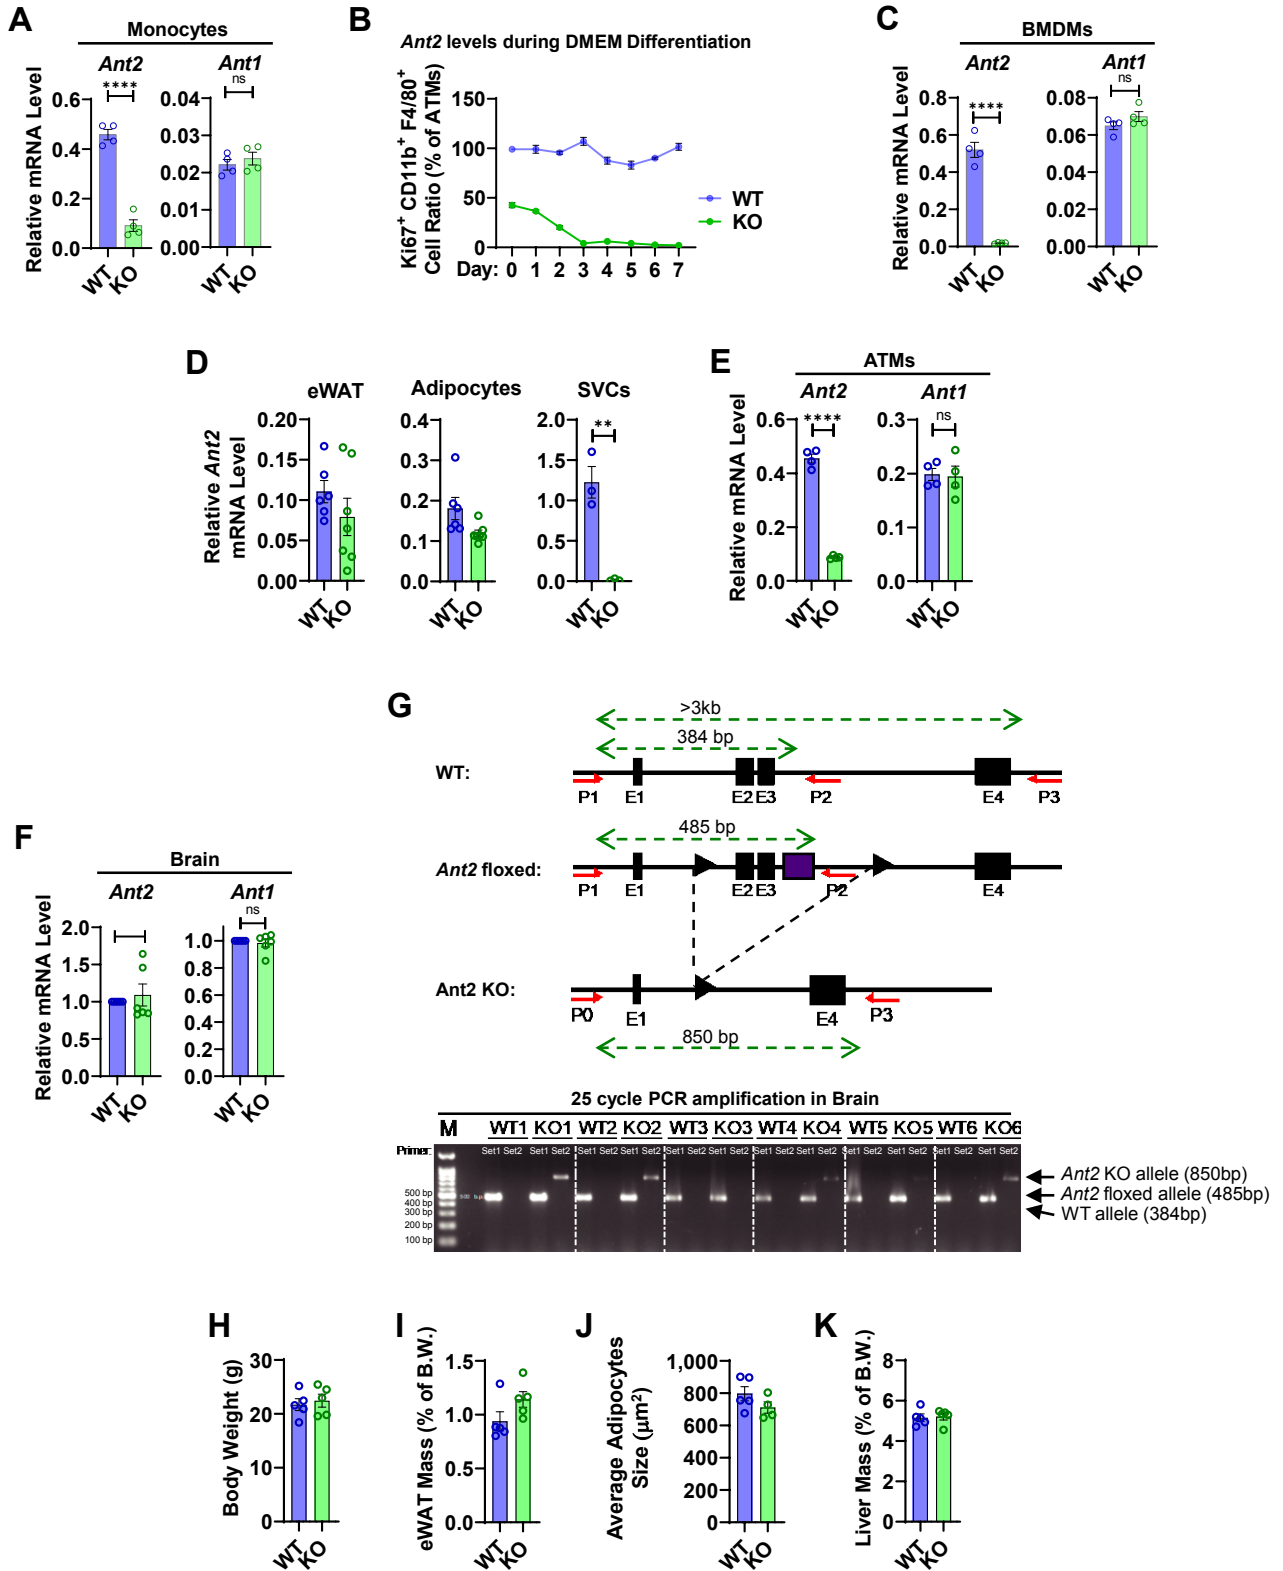

**L**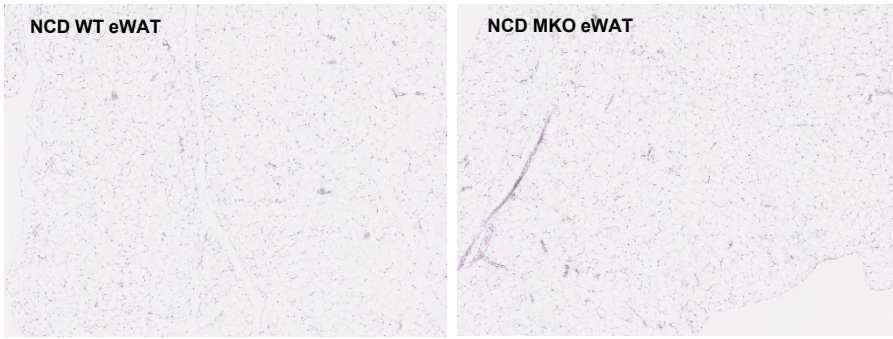**M**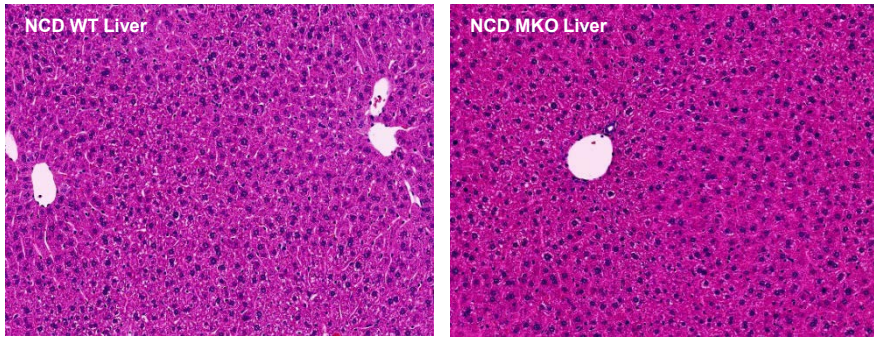**N**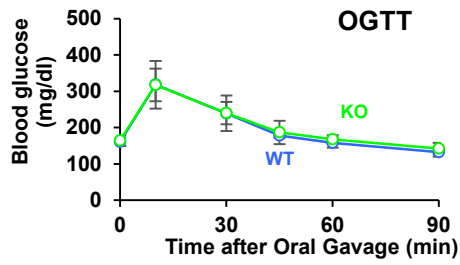**O**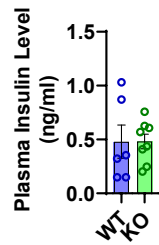**P**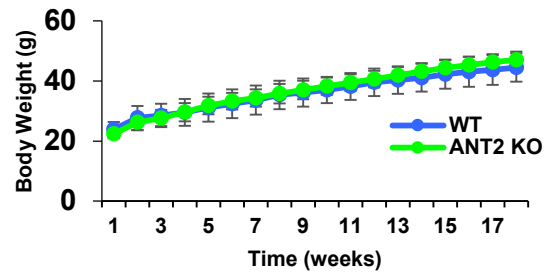

**A**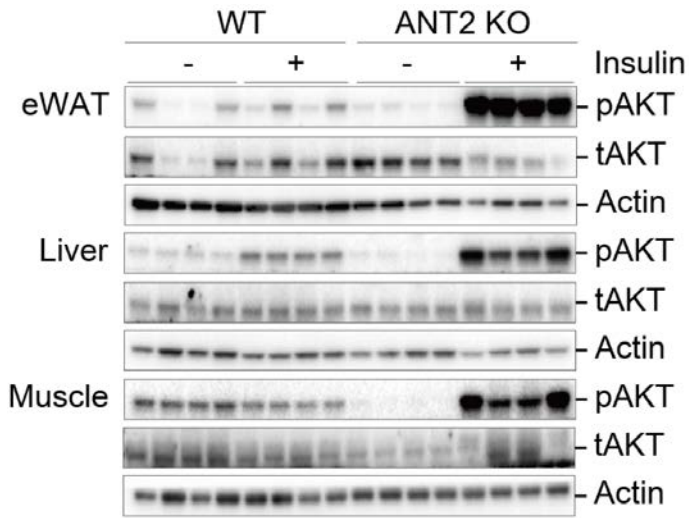**B**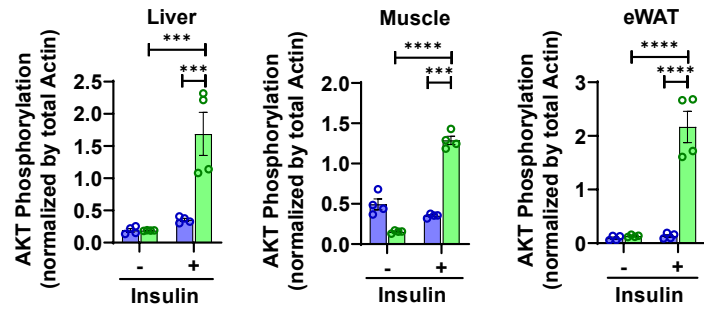



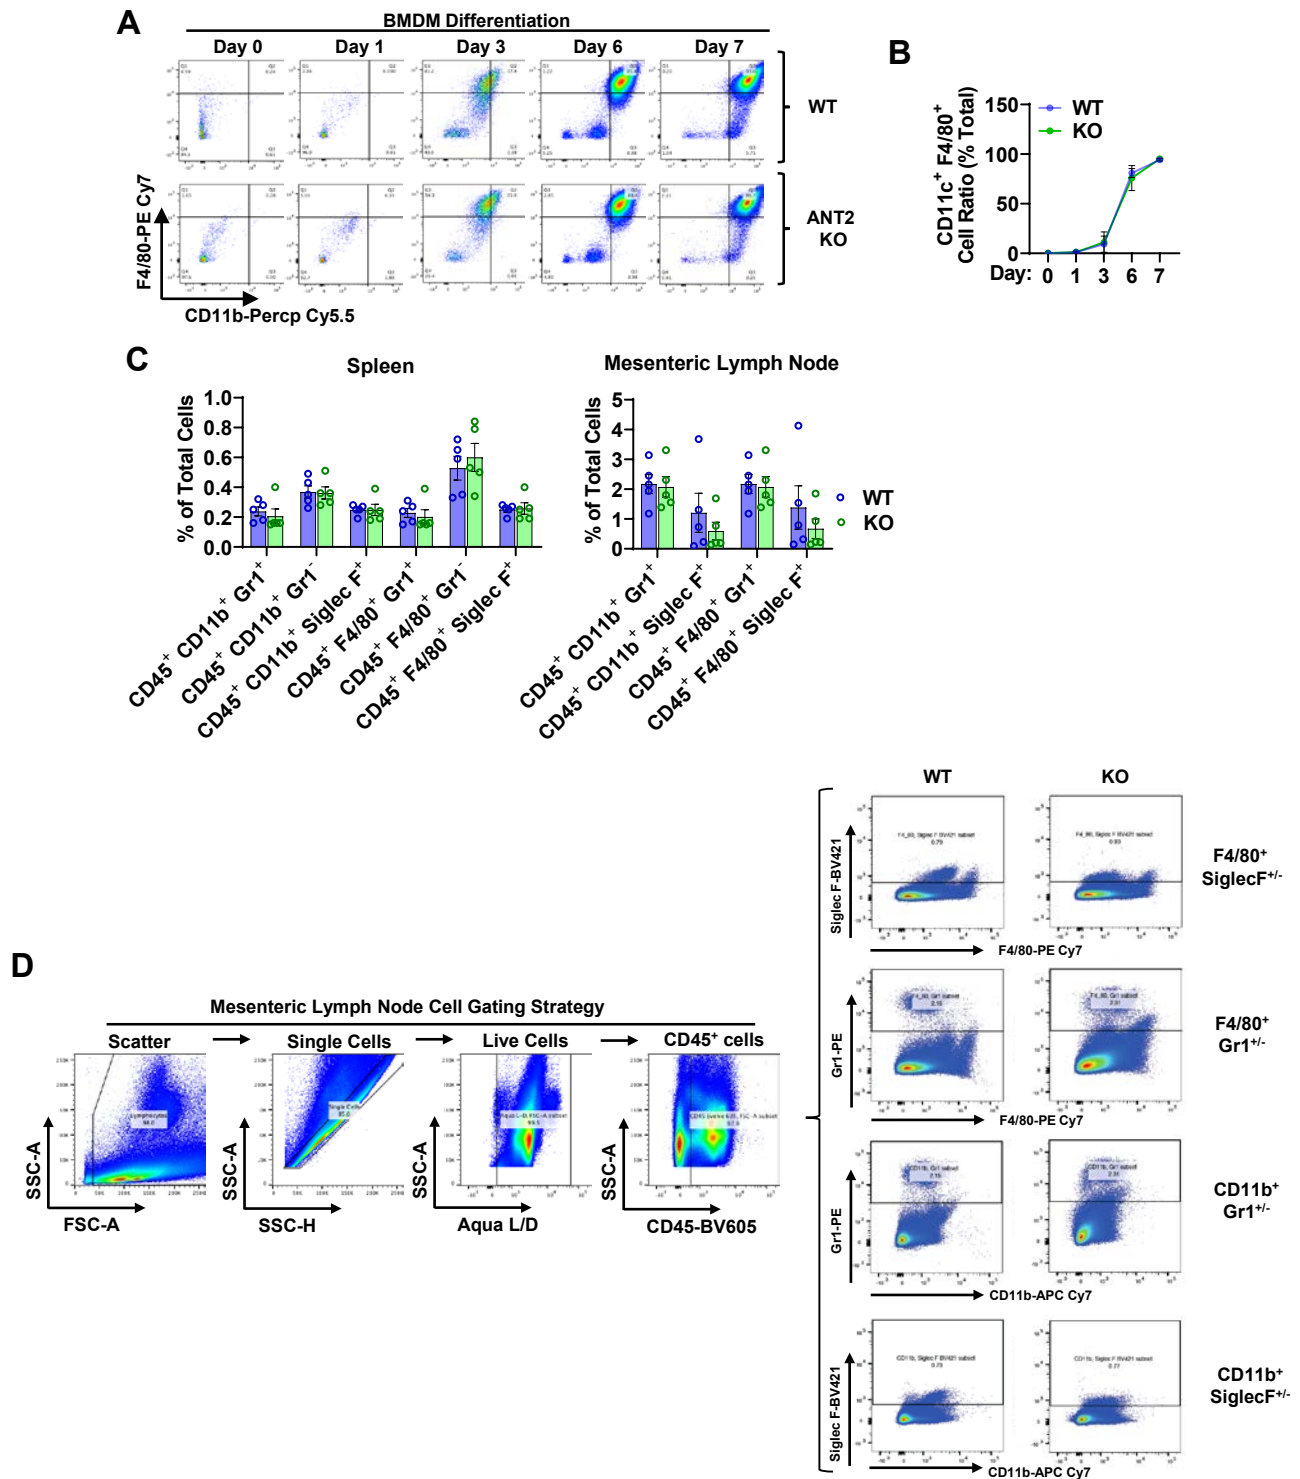

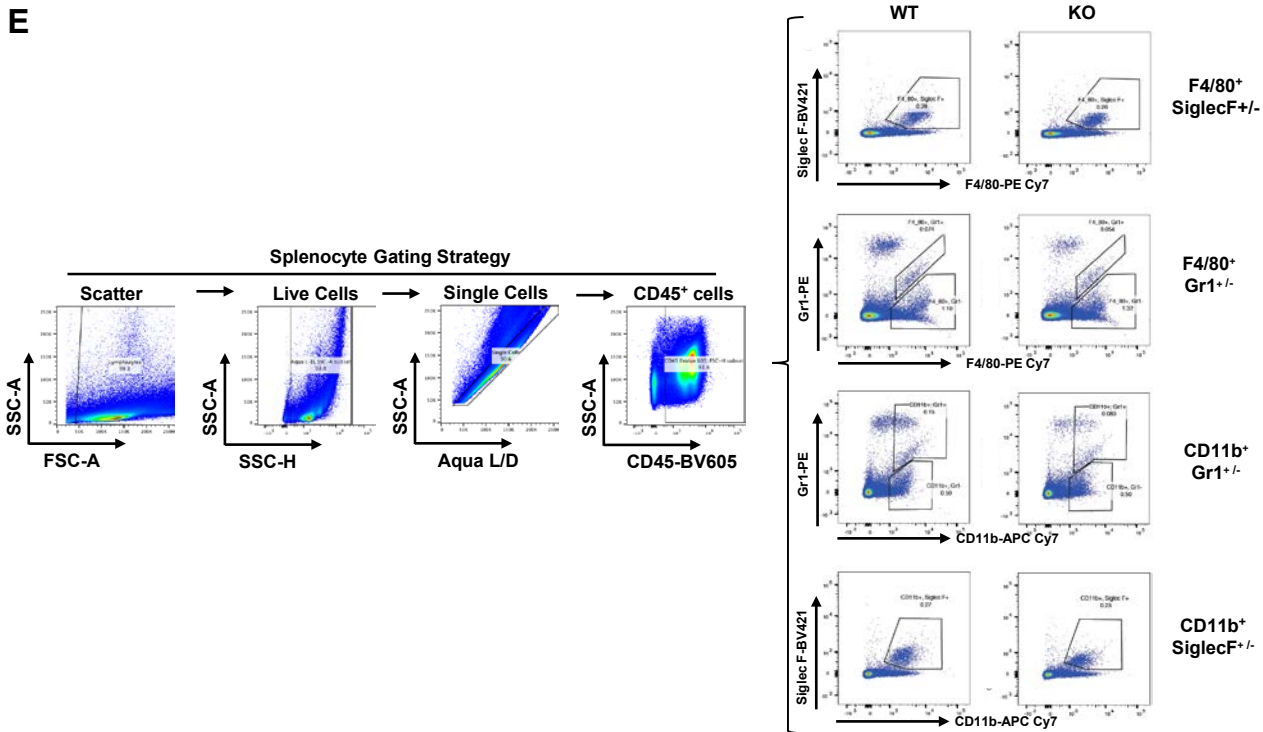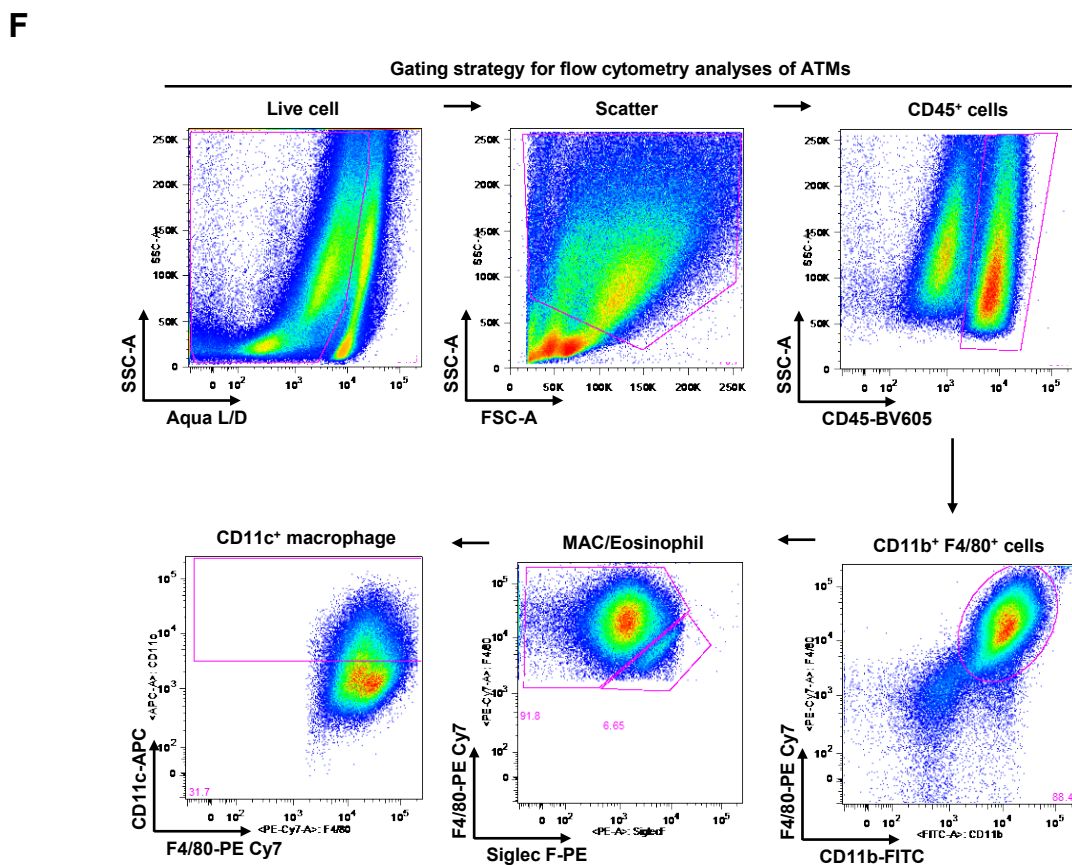

**G**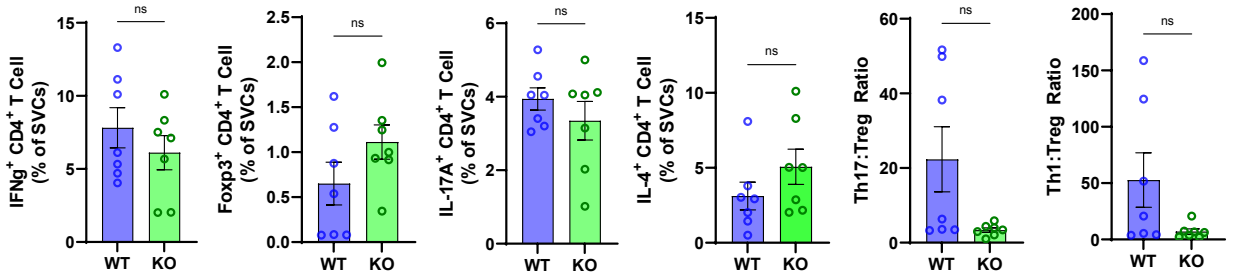**H**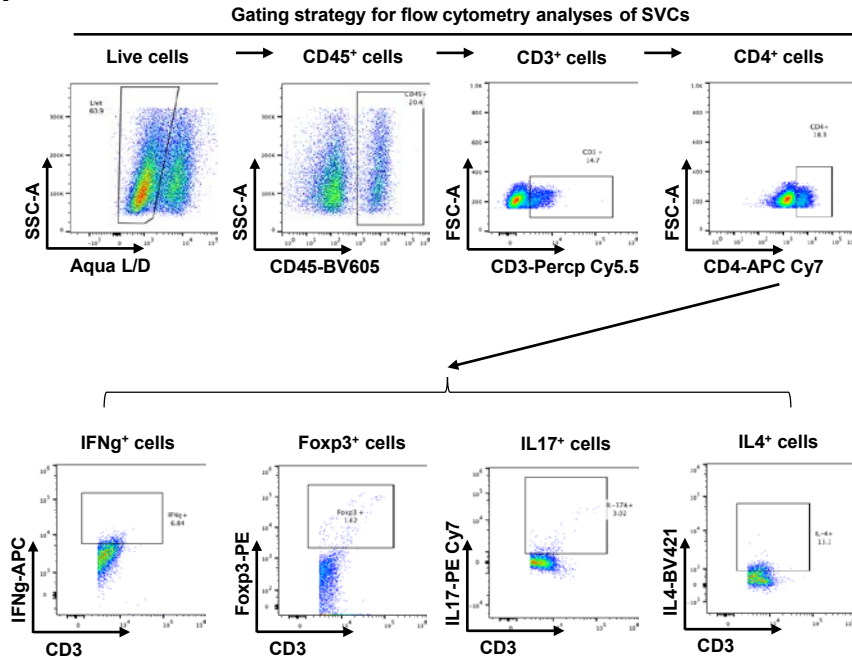

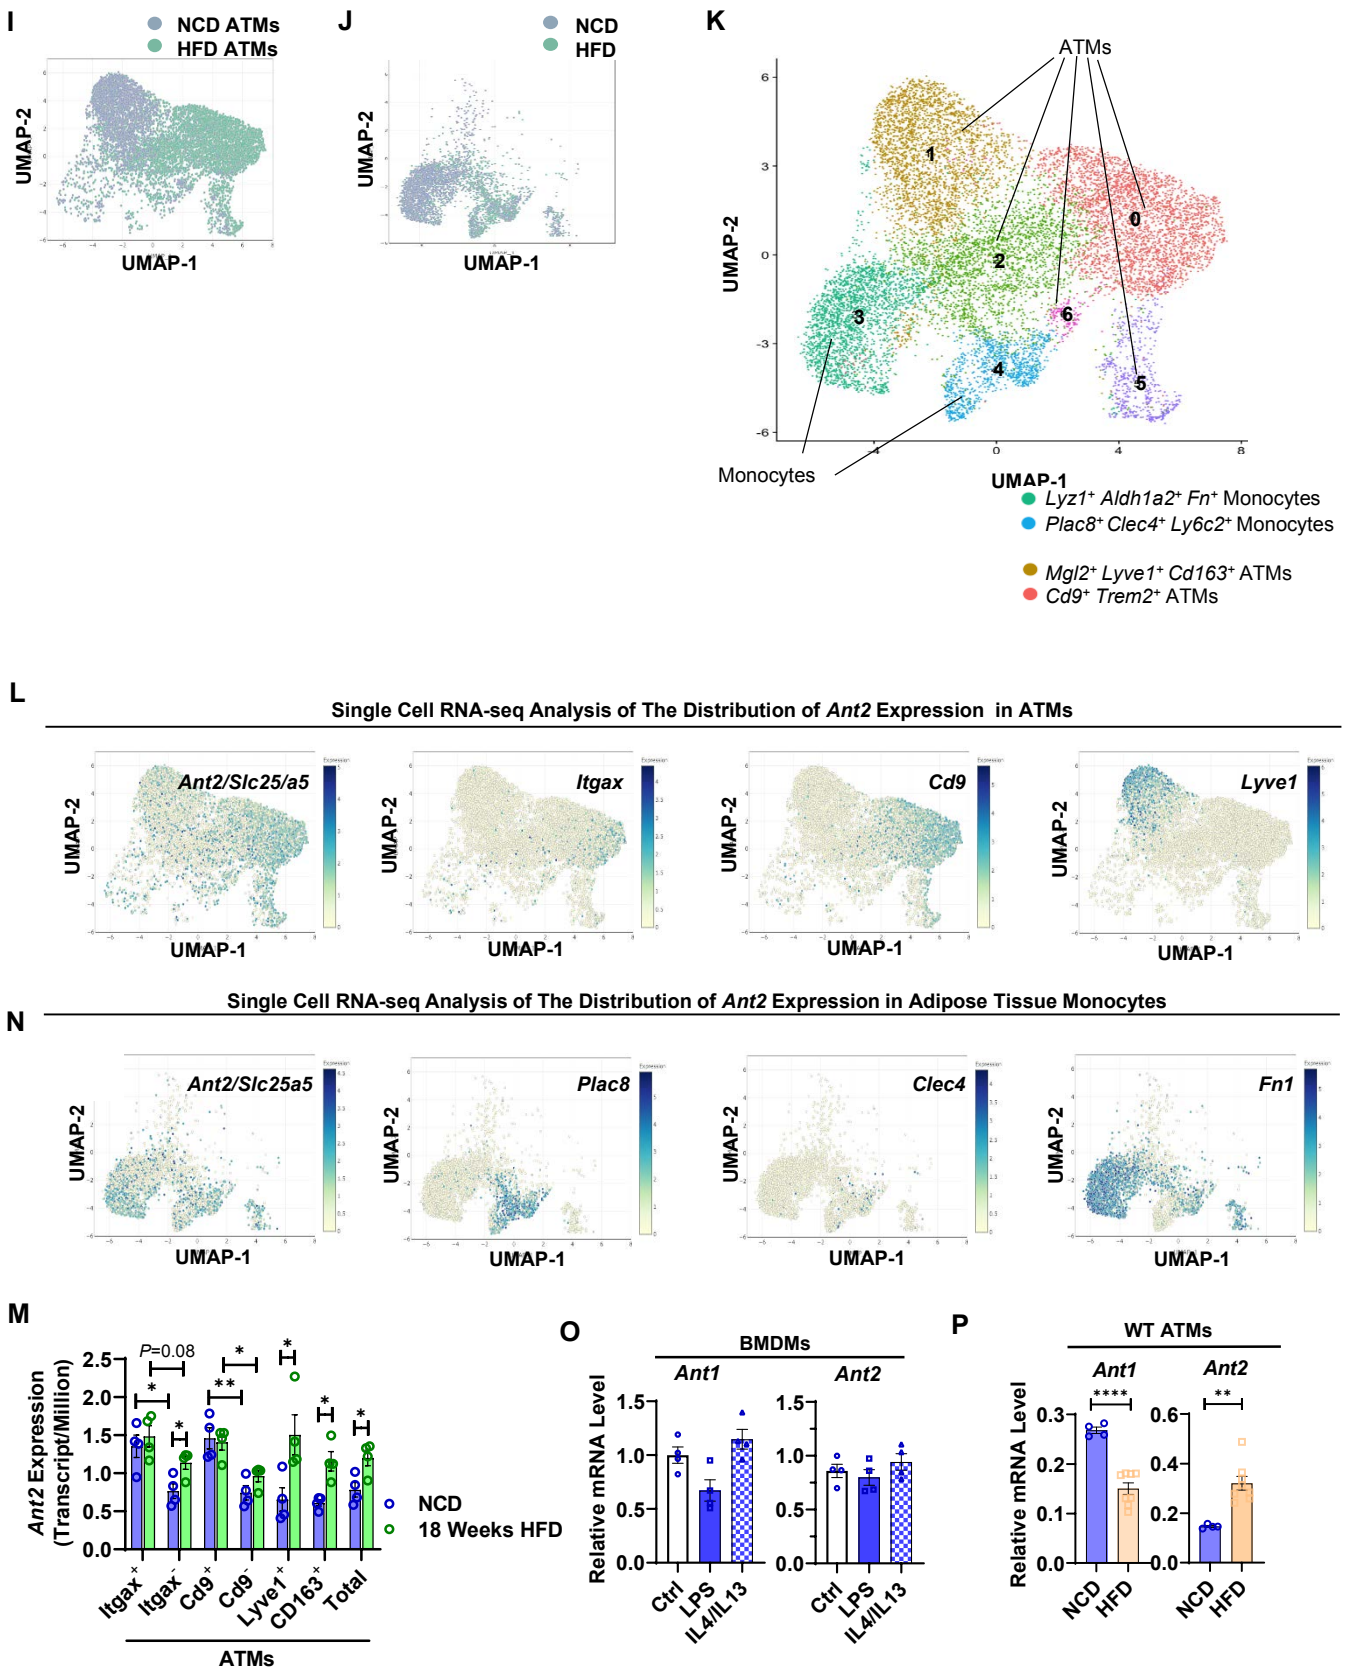

Supplementary Figure 3

**A**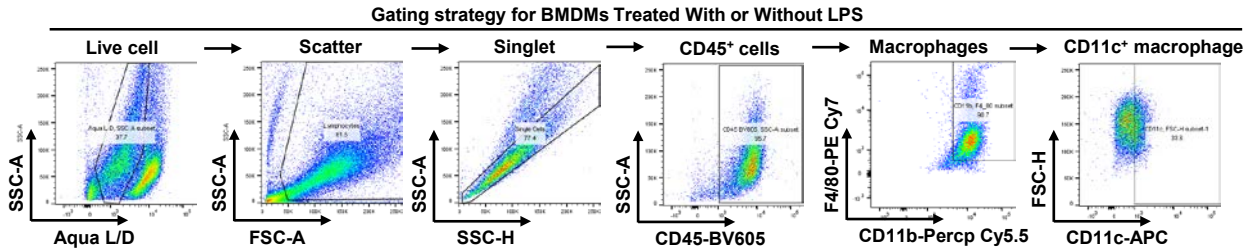**B**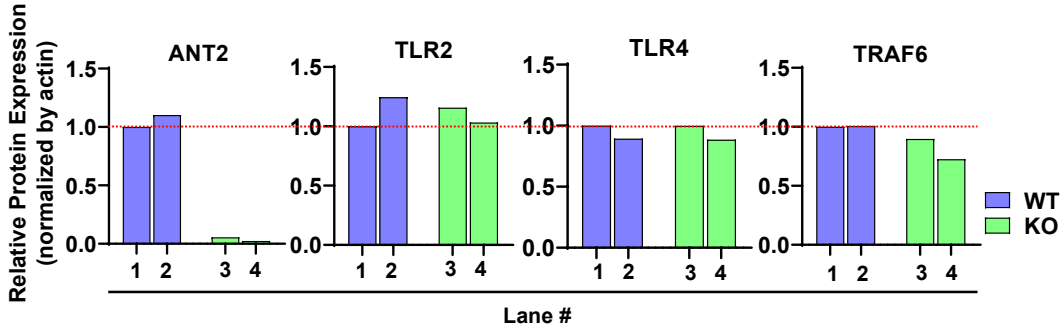**C**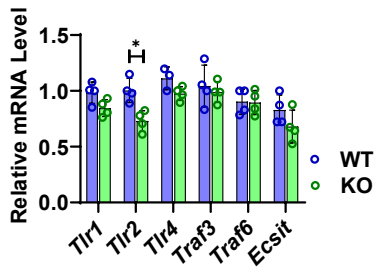**D**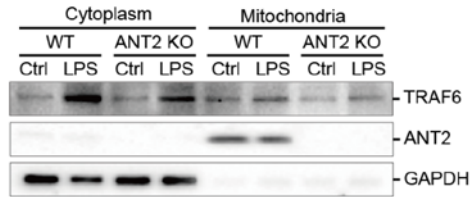**E**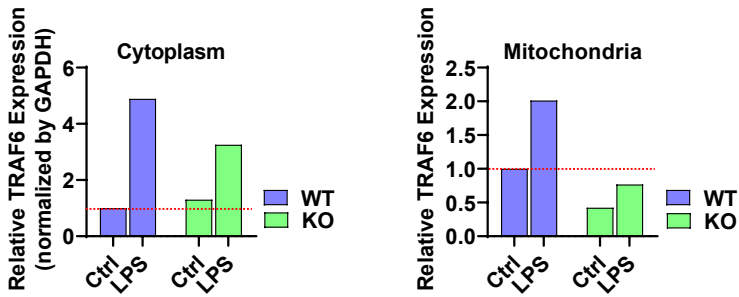

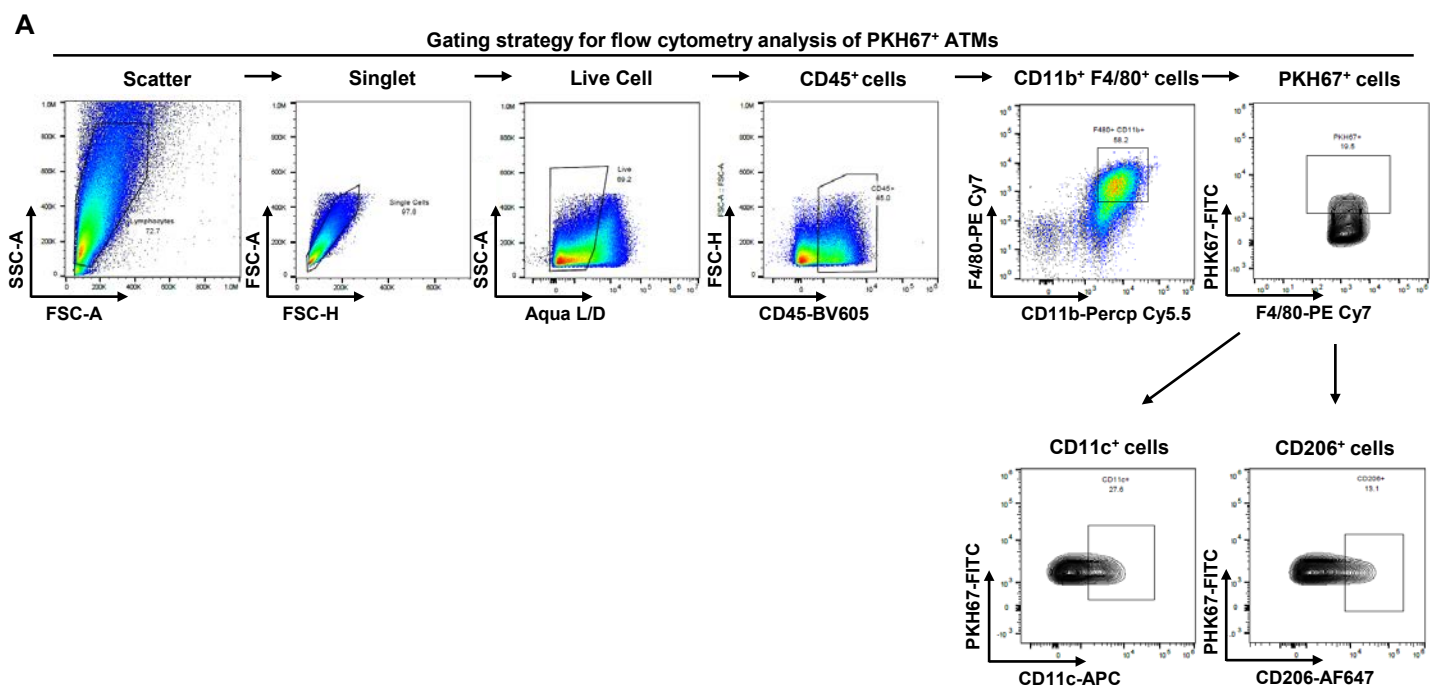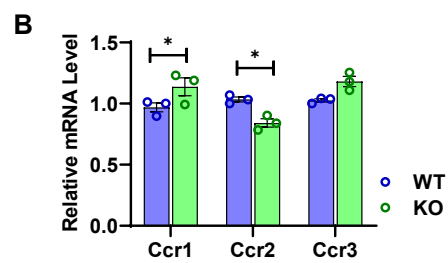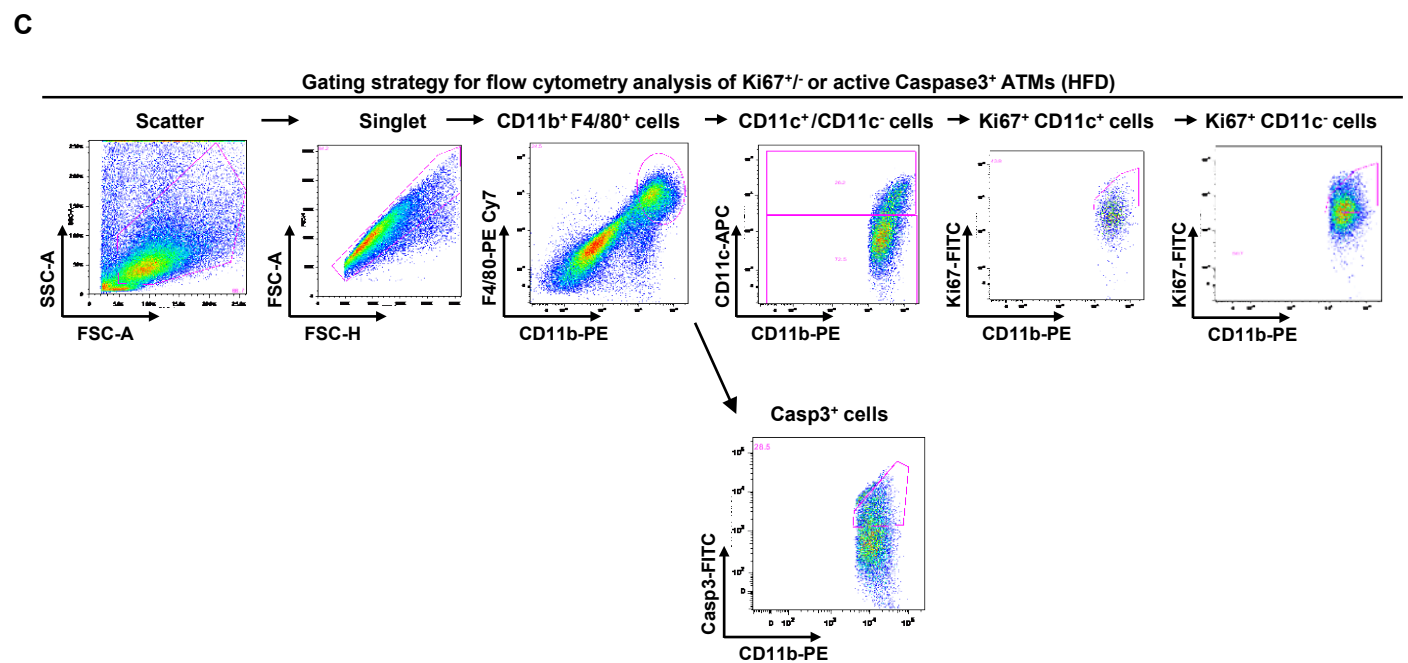

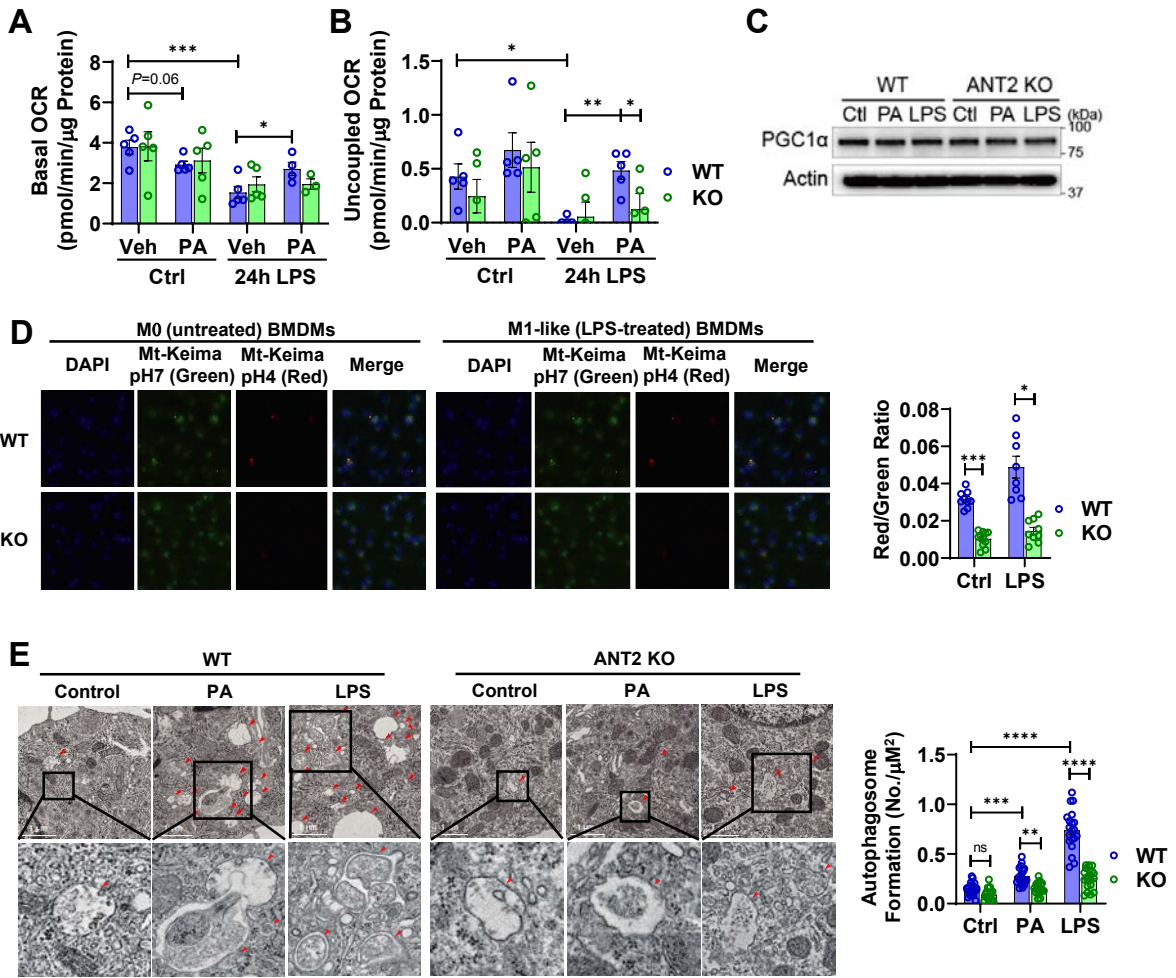

**A**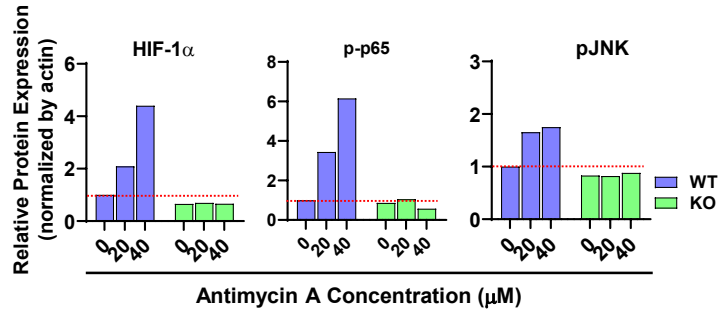



**A**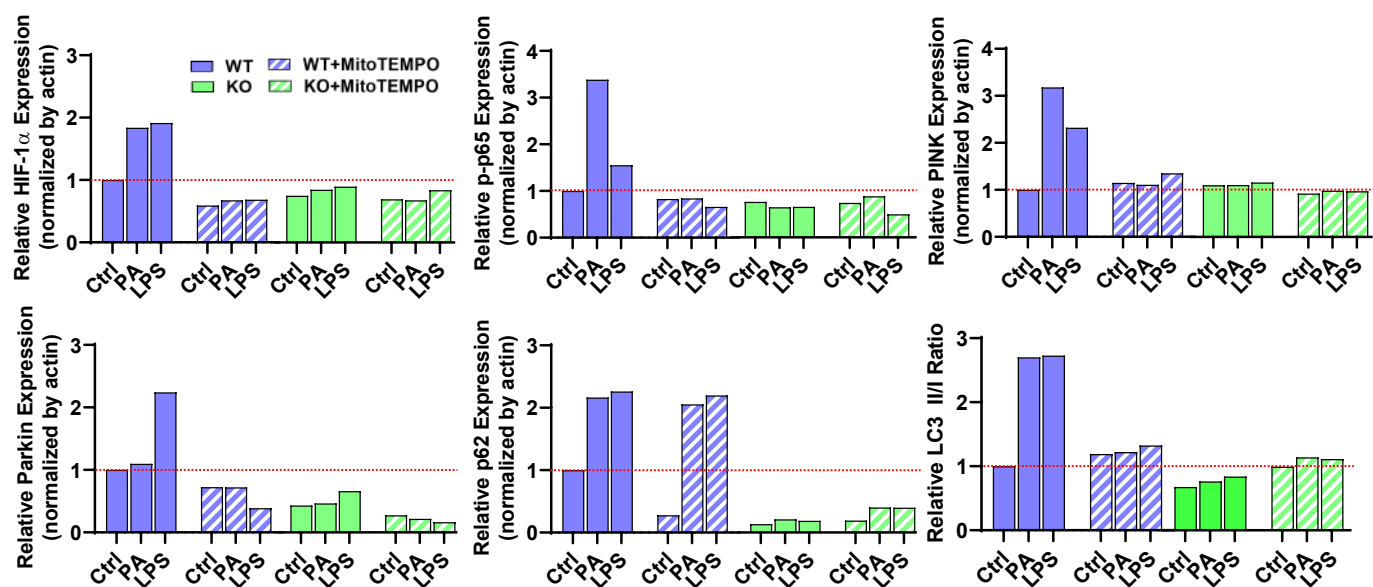**B**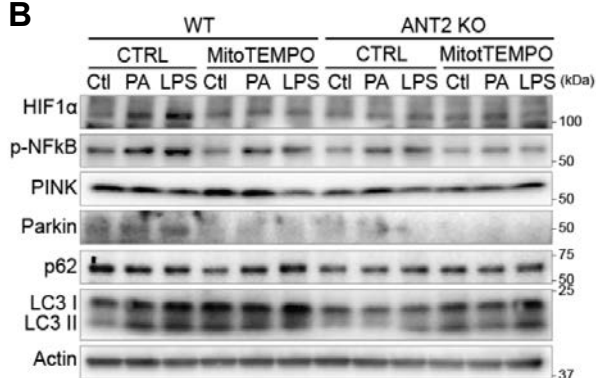**C**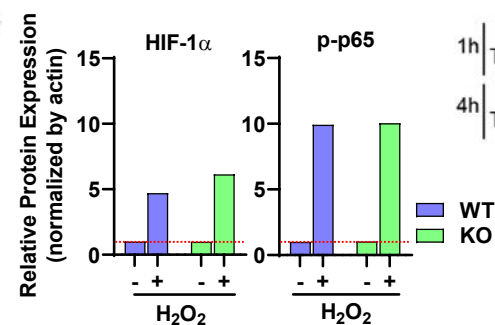**D**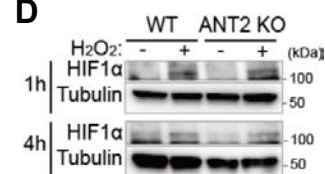**E**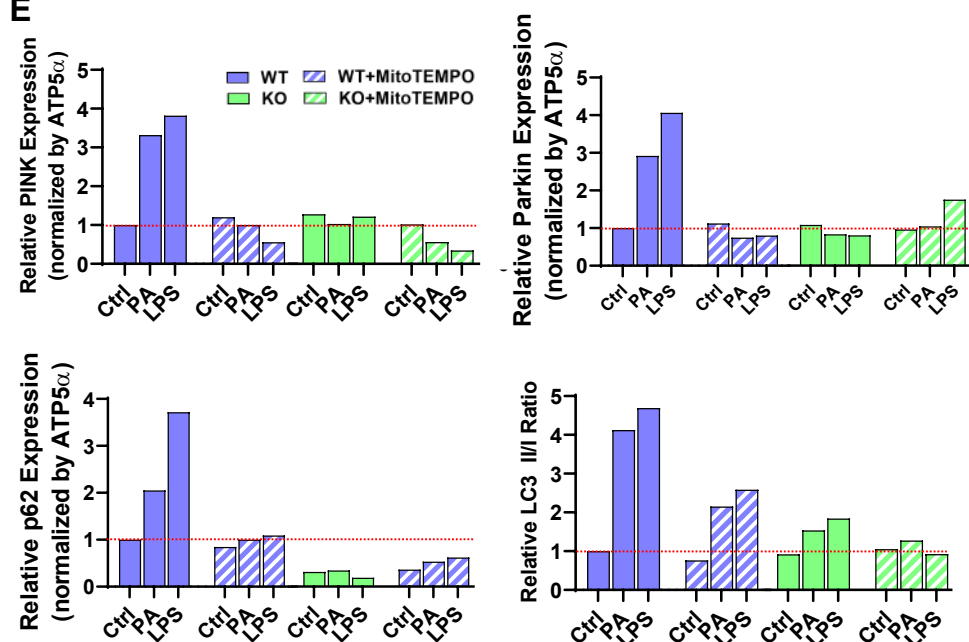

**Supplementary Table 1. Fast gene set enrichment analysis in CD11c<sup>+</sup> ATMs isolated from HFD ANT2 MKO and WT ATMs**

|                                            | Gene Ranks | NES*  | Adj P value** |
|--------------------------------------------|------------|-------|---------------|
| HALLMARK_EPITHELIAL_MESENCHYMAL_TRANSITION |            | 3.12  | 8.9e-29       |
| HALLMARK_OXIDATIVE_PHOSPHORYLATION         |            | 2.48  | 3.8e-14       |
| HALLMARK_ADIPOGENESIS                      |            | 2.38  | 2.4e-12       |
| HALLMARK_HYPOXIA                           |            | 2.21  | 2.3e-09       |
| HALLMARK_XENOBIOTIC_METABOLISM             |            | 2.19  | 1.3e-08       |
| HALLMARK_GLYCOLYSIS                        |            | 2.12  | 4.6e-08       |
| HALLMARK_APICAL_JUNCTION                   |            | 2.19  | 5.3e-08       |
| HALLMARK_FATTY_ACID_METABOLISM             |            | 2.16  | 1.1e-07       |
| HALLMARK_CHOLESTEROL_HOMEOSTASIS           |            | 2.33  | 5.2e-07       |
| HALLMARK_PEROXISOME                        |            | 2.25  | 6.3e-07       |
| HALLMARK_PI3K_AKT_MTOR_SIGNALING           |            | -0.92 | 7.0e-01       |
| HALLMARK_SPERMATOGENESIS                   |            | -1.04 | 4.3e-01       |
| HALLMARK_IL6_JAK_STAT3_SIGNALING           |            | -1.20 | 1.9e-01       |
| HALLMARK_INFLAMMATORY_RESPONSE             |            | -1.45 | 7.4e-03       |
| HALLMARK_KRAS_SIGNALING_DN                 |            | -1.65 | 2.8e-03       |
| HALLMARK_G2M_CHECKPOINT                    |            | -1.57 | 1.6e-03       |
| HALLMARK_ALLOGRAFT_REJECTION               |            | -1.59 | 1.3e-03       |
| HALLMARK_E2F_TARGETS                       |            | -1.60 | 5.2e-04       |
| HALLMARK_INTERFERON_ALPHA_RESPONSE         |            | -2.34 | 5.7e-08       |
| HALLMARK_INTERFERON_GAMMA_RESPONSE         |            | -2.26 | 1.7e-10       |

RNA-seq analysis was performed in CD11c<sup>+</sup> ATMs isolated from ANT2 MKO and WT control mice fed HFD, and the resulting data were subjected to fast gene set enrichment analysis. Positive NES values indicate that the majority of genes implicated in the corresponding pathway or gene network generally showed increased expression in HFD ANT2 KO ATMs compared with HFD WT ATMs, whereas negative NES values indicate that the majority of genes implicated in the corresponding pathway or gene network generally showed decreased expression in HFD ANT2 KO ATMs compared with HFD WT ATMs. The gene rank plot shows fold changes in the expression of each of the genes that are implicated in the corresponding pathway or gene network. Thus, fold changes of the most highly increased genes are plotted on the left, whereas, fold changes of the most highly decreased genes are plotted on the right.

\*NES, normalized enrichment score. \*\* Adj P value, BH adjusted P value.

**Supplementary Table 2. Detailed Information of The Reagents And Resources**

| REAGENT or RESOURCE                           | SOURCE                  | IDENTIFIER                          |
|-----------------------------------------------|-------------------------|-------------------------------------|
| Antibodies                                    |                         |                                     |
| Anti-HIF-1 $\alpha$                           | Abcam                   | Cat# ab2185; RRID: AB_302883        |
| Anti-ANT1                                     | Abcam                   | Cat# ab102032; RRID: AB_10710263    |
| Anti-ANT2                                     | Cell signaling          | Cat# 14671S; RRID:AB_2798562        |
| Anti-NF $\kappa$ B p65, phospho (Ser536)      | Cell signaling          | Cat# 3033S; RRID:AB_331284          |
| Anti-SAPK/JNK                                 | Cell signaling          | Cat# 9252S; RRID:AB_2250373         |
| Anti-phospho SAPK/JNK, (Thr183/Tyr185)        | Cell signaling          | Cat# 9255S; RRID:AB_2307321         |
| Anti-SQSTM1/p62 (D6M5X)                       | Cell signaling          | Cat# 23214S; RRID:AB_2798858        |
| Anti-LC3                                      | Cell signaling          | Cat# 4108S; RRID:AB_2137703         |
| Anti-Parkin                                   | Abcam                   | Cat# ab77924; RRID: AB_1566559      |
| Anti-Parkin                                   | Abcam                   | Cat# ab15494; RRID:AB_301903        |
| Anti-PINK1                                    | Abcam                   | Cat# ab23707; RRID:AB_447627        |
| Anti-Mitofusin 2                              | Abcam                   | Cat# ab56889; RRID:AB_2142629       |
| Total OXPHOS Rodent Antibody Cocktail         | Abcam                   | Cat# ab110413; RRID:AB_2629281      |
| Anti-Akt                                      | Cell signaling          | Cat# 4685; RRID: AB_2225340         |
| Anti-phospho Akt (S473)                       | Cell signaling          | Cat# 4060; RRID: AB_2315049         |
| Anti- $\beta$ -Actin                          | Sigma                   | Cat# A2228; RRID:AB_476697          |
| Anti- $\alpha$ -Tubulin                       | Abcam                   | Cat# ab4074; RRID:AB_2288001        |
| Anti-CD45 Brilliant Violet 605                | BioLegend               | Cat# 103139, RRID: AB_2562341       |
| Anti-CD11b PerCP-Cyanine5.5                   | Thermo Fisher           | Cat# 45-0112-82, RRID: AB_953558    |
| Anti-CD11b APC-Cyanine7                       | BioLegend               | Cat# 101226, RRID: AB_830642        |
| Anti-CD11b PE                                 | Thermo Fisher           | Cat# 12-0112-82, RRID: AB_2734869   |
| Anti-F4/80 PE-Cyanine7                        | Thermo Fisher           | Cat# 25-4801-82, RRID: AB_469653    |
| Anti-F4/80 PE                                 | BioLegend               | Cat# 123110, RRID: AB_893486        |
| Anti-CD11c APC                                | Thermo Fisher           | Cat# 17-0114-82, RRID: AB_469346    |
| Anti-Ki67 FITC                                | Thermo Fisher           | Cat# 11-5698-82, RRID: AB_11151330  |
| Anti-Ki67 PE                                  | Thermo Fisher           | Cat# 12-5698-82, RRID: AB_11150954  |
| Anti-FoxP3 PE                                 | Thermo Fisher           | Cat# 12-5773-80, RRID: AB_465935    |
| Anti-CD170 (Siglec-F) Brilliant Violet 421    | BioLegend               | Cat# 155509, RRID: AB_2810421       |
| Anti-CD3 PerCP-Cyanine5.5                     | BioLegend               | Cat# 100218, RRID: AB_1595492       |
| Anti-CD4 APC-Cyanine7                         | BioLegend               | Cat# 100525, RRID: AB_312726        |
| Anti-CD8 Alexa Fluor 488                      | BioLegend               | Cat# 100723, RRID: AB_389304        |
| Anti-IL-4 Brilliant Violet 421                | BioLegend               | Cat# 504120, RRID: AB_2562102       |
| Anti-IL-17A PE-Cyanine7                       | Thermo Fisher           | Cat# 25-7177-80, RRID: AB_10717952  |
| Anti-IFN $\gamma$ APC                         | Thermo Fisher           | Cat# 17-7311-82, RRID: AB_469504    |
| Anti-Ly6C PE                                  | Thermo Fisher           | Cat# 560592, RRID: AB_1727556       |
| Anti-Ly6G PerCP-Cyanine5.5                    | BioLegend               | Cat# 127616, RRID: AB_1877271       |
| Anti-CD16/CD32                                | Thermo Fisher           | Cat# 14-0161-86, RRID: AB_467135    |
| Rabbit IgG                                    | Sigma                   | Cat# GLNA 934V                      |
| Mouse IgG                                     | Jackson Immuno Research | Cat# 115-035-003, RRID: AB_10015289 |
| Chemicals, Peptides, and Recombinant Proteins |                         |                                     |
| Palmitic acid                                 | Sigma                   | Cat# P9767                          |

|                                                                      |                |                                                                                                                 |
|----------------------------------------------------------------------|----------------|-----------------------------------------------------------------------------------------------------------------|
| LPS from <i>E.coli</i> O127:B8                                       | Sigma          | Cat# L3129                                                                                                      |
| Insulin (Norvolin R)                                                 | Norvo Nordisk  | Cat# 0169-1833-11                                                                                               |
| 50% Dextrose                                                         | Hospira        | Cat# 0409-6648-02                                                                                               |
| IL-4                                                                 | PeptoTech      | Cat# 214-14                                                                                                     |
| IL-13                                                                | PeptoTech      | Cat# 210-13                                                                                                     |
| MitoTEMPO                                                            | Cayman         | Cat# 16621                                                                                                      |
| Collagenase from <i>Clostridium histolyticum</i>                     | Sigma          | Cat# C1764                                                                                                      |
| 60% high-fat diet                                                    | Research Diets | Cat# D12492                                                                                                     |
| Trizol™ Reagent                                                      | ThermoFisher   | Cat# 15596026                                                                                                   |
| SMARTScribe Reverse Transcriptase                                    | Clontech       | Cat# 639537                                                                                                     |
| RBC lysis buffer                                                     | eBioscience    | Cat# 00-4333-57                                                                                                 |
| Lipofectamine 2000                                                   | ThermoFisher   | Cat# 11668030                                                                                                   |
| Lipofectamine RNA iMAX                                               | ThermoFisher   | Cat# <u>13778150</u>                                                                                            |
| Recombinant Mouse M-CSF                                              | Biolegend      | Cat# 576406                                                                                                     |
| TransIT®-LT1 Transfection Reagent                                    | Mirus          | Cat# MIR2300                                                                                                    |
| Endotoxin-low Bovine Serum Albumin                                   | Sigma          | Cat# A8806                                                                                                      |
| LIVE/DEAD™ Fixable Cell Stain Kit                                    | ThermoFisher   | Cat# L34966                                                                                                     |
| PKH67 Fluorescent Cell Linker Kits                                   | Sigma          | Cat# MINI67-1KT                                                                                                 |
| ROS Detection Reagent                                                | ThermoFisher   | Cat# C6827                                                                                                      |
| MitoSOX Red mitochondrial superoxide indicator for live-cell imaging | ThermoFisher   | Cat# M36008                                                                                                     |
| Mitochondria Isolation Kit for Cultured cells                        | ThermoFisher   | Cat# 89874                                                                                                      |
| UK5099                                                               | Sigma          | Cat# PZ0160                                                                                                     |
| BPTES                                                                | Sigma          | Cat# SML2472                                                                                                    |
| Etomoxir                                                             | Sigma          | Cat# E1905                                                                                                      |
| Oligomycin                                                           | Sigma          | Cat# 75351                                                                                                      |
| DNP                                                                  | Sigma          | Cat# 34334                                                                                                      |
| Myxothiazol                                                          | Sigma          | Cat# T5580                                                                                                      |
| Cyclosporine A                                                       | TOCRIS         | Cat# 59865-13-3                                                                                                 |
| TRO 19622                                                            | TOCRIS         | Cat# 22033-87-0                                                                                                 |
| Critical Commercial Assays                                           |                |                                                                                                                 |
| Citrate Synthase Activity Colorimetric Assay Kit                     | BioVision      | Cat# K318-100                                                                                                   |
| Caspase-Glo® 3/7 Assay System                                        | Promega        | Cat# G8092                                                                                                      |
| RNeasy Micro Kit                                                     | Zymo research  |                                                                                                                 |
| Insulin ELISA kit                                                    | ALPCO          | Cat# 80-INSHU-E01.1                                                                                             |
| MitoProbe™ Transition Pore Assay Kit                                 | ThermoFisher   | Cat# M34153                                                                                                     |
| MitoProbe™ JC-1 Assay Kit for Flow Cytometry                         | ThermoFisher   | Cat# M34152                                                                                                     |
| Experimental Models: Cell Lines                                      |                |                                                                                                                 |
| 3T3-L1 cell line                                                     | ATCC           | ATCC® CL-173™                                                                                                   |
| Recombinant DNA                                                      |                |                                                                                                                 |
| mKeima-Red-Mito-7                                                    | Addgene        | Cat# 56018 ;<br><a href="http://n2t.net/addgene:56018">http://n2t.net/addgene:56018</a> ;<br>RRID:Addgene_56018 |

|                         |                   |                                                                                                                  |
|-------------------------|-------------------|------------------------------------------------------------------------------------------------------------------|
| CA-HIF1 $\alpha$        | Addgene           | Cat # 44028 ;<br><a href="http://n2t.net/addgene:44028">http://n2t.net/addgene:44028</a> ;<br>RRID:Addgene_44028 |
| Software and Algorithms |                   |                                                                                                                  |
| GraphPad Prism v.8      | GraphPad Software | GraphPad Prism, RRID: SCR_002798                                                                                 |
| Seahorse Wave v.2.2.0   | Agilent           | Seahorse Wave, RRID: SCR_014526                                                                                  |
| FlowJo                  | FlowJo            | FlowJo, RRID: SCR_008520                                                                                         |
| ImageJ                  | NIH               | <a href="https://imagej.nih.gov/ij/">https://imagej.nih.gov/ij/</a>                                              |

**Supplementary Table 3. PCR Primer Sequences**

| Gene Symbol and Full Name                    |                                                               | Forward primer, 5' - 3'      | Reverse primer, 5' - 3'       |
|----------------------------------------------|---------------------------------------------------------------|------------------------------|-------------------------------|
| <i>Hif1a</i>                                 | Hypoxia-inducible factor 1-alpha                              | CAAGATCTCGGCGAAGCAA          | GGTGAGCCTCATAACAGAAGCTTT      |
| <i>Hif2a</i>                                 | Hypoxia-inducible factor 2-alpha                              | TAAAGCGGCAGCTGGAGTAT         | ACTGGGAGGCATAGCACTGT          |
| <i>Glut4</i>                                 | Glucose transporter 4                                         | ATGAGAAACGGAAGTTGGAGAG       | GTGGGTGCGGCTGCC               |
| <i>Adipoq</i>                                | AdipoQ, also known as Adiponectin and Acrp30                  | TGTTCTCTTAATCCTGCCCA         | CCAACCTGCACAAGTTCCTT          |
| <i>Tnf</i>                                   | Tumour necrosis factor alpha                                  | GAAATGCCACCTTTTGACAGTG       | TGGATGCTCTCATCAGGACAG         |
| <i>Ccl5</i>                                  | Regulated on activation, normal T cell expressed and secreted | TGCCCTCACCATCATCCTCAC        | GGCGGTTCCCTCGAGTGACA          |
| <i>Ifng</i>                                  | Interferon gamma                                              | ACAGCAAGGCGAAAAAGGATG        | TGGTGGACCACTCGGATGA           |
| <i>Ant1</i>                                  | Adenine nucleotide translocase 1                              | GAATGCTCCCAGATCCCAAGAAT      | AAAGGATAGGAAGTCAGGCCA         |
| <i>Ant2</i>                                  | Adenine nucleotide translocase 2                              | AGAGTGTGACAGCCGTTGC          | ACCTTTGAAGAAAGCGTTGGC         |
| <i>Il6</i>                                   | Interleukin 6                                                 | GCTACCAAACCTGGATATAATC       | CCAGGTAGCTATGGTACTCCA         |
| <i>Tgfb</i>                                  | Transforming growth factor beta                               | GTGGAAATCAACGGGATCAG         | ACTTCCAACCCAGGTCCTTC          |
| <i>Itgax</i>                                 | Integrin alpha-X protein                                      | CTGGATAGCCTTTCTTCTGCT        | GCACACTGTGTCCGAACTC           |
| <i>Nos2</i>                                  | Inducible nitric oxide synthase                               | CTCAGCCCAACAATACAAGAT        | TGTGGTGAAGAGTGTGATGCA         |
| <i>Arg1</i>                                  | Arginase 1                                                    | CTCCAAGCCAAAGTCCTTAGA        | AGGAGCTGTCATTAGGGACAT         |
| <i>Il10</i>                                  | Interleukin 10                                                | CCAAGCCTTATCGGAAATGA         | TTTTCACAGGGGAGAAATCG          |
| <i>36B4</i>                                  | 60S Acidic Ribosomal Protein P0                               | AGATGCAGCAGATCCGCAT          | GTTCTTGCCCATCAGCACC           |
| <b>Primers used for mouse genotyping</b>     |                                                               |                              |                               |
| Cre                                          | Cre recombinase                                               | TGCAAGTTGAATAACCGGAAA        | CTAGAGCCTGTTTTGCACGTT         |
| Primer set 1                                 |                                                               | ACTCAACCTAGGGCCTTGTG         | GGGAGCATTCTGAAAAATAA          |
| Primer set 2                                 |                                                               | ACTCAACCTAGGGCCTTGTG         | GACTTACCCTCCACGACAGC          |
| <b>Primers used for mtDNA content assays</b> |                                                               |                              |                               |
| mtDNA                                        | Mitochondrial DNA                                             | CCCAGCTACTACCATCATTCAAG<br>T | GATGGTTTGGGAGATTGGTTGATG<br>T |
| 18S                                          | 18S ribosomal RNA                                             | AGTCCCTGCCCTTTGTACACA        | GATCCGAGGGCCTCACTAAAC         |

Full unedited gel for Figure. 1I

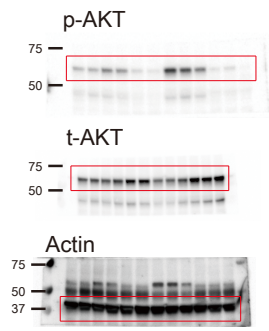

Full unedited gel for Figure. 1J

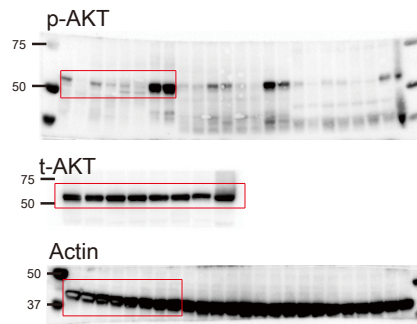

Full unedited gel for Figure. 1K

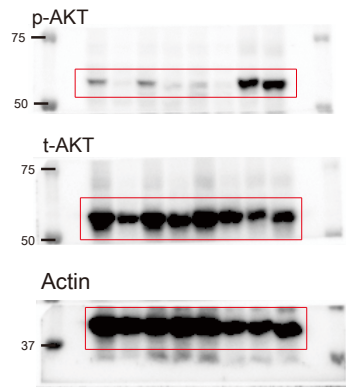

Full unedited gel for Figure. 3G

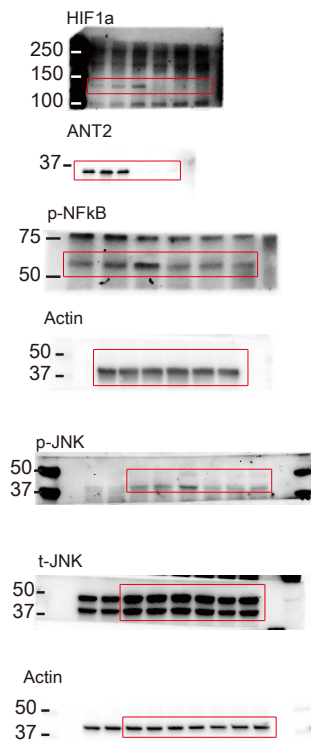

Full unedited gel for Figure. 3J

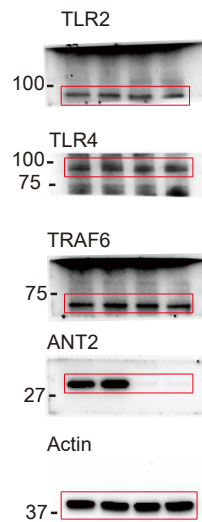

Full unedited gel for Figure. 6D

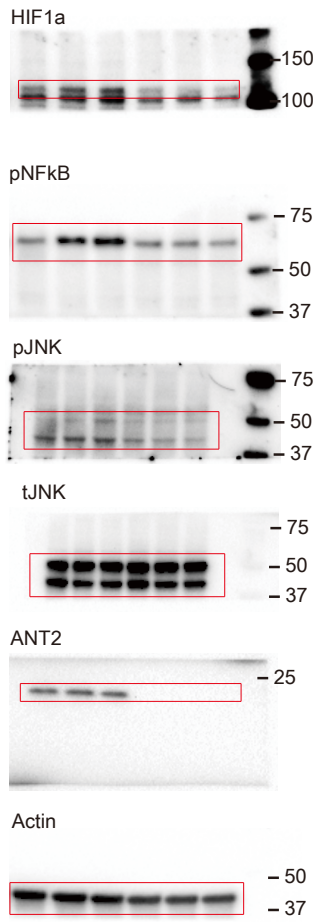

Full unedited gel for Figure. 7A

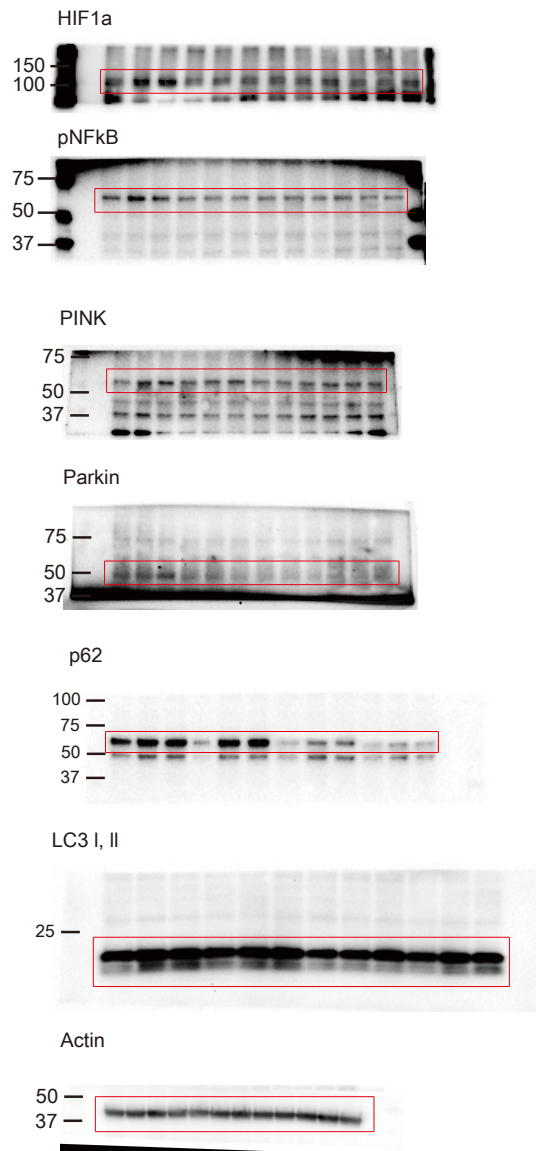

Full unedited gel for Figure. 7C

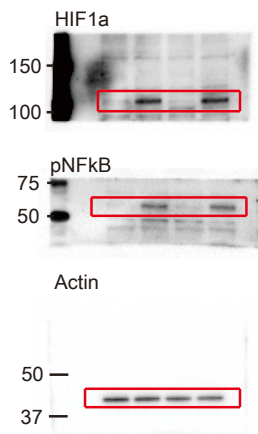



Full unedited gel for Figure. 7F

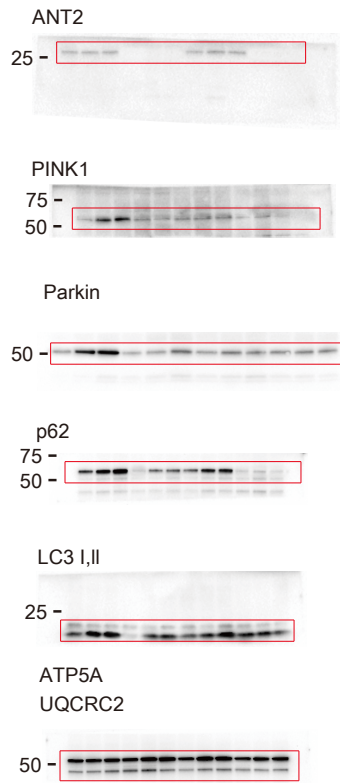

Full unedited gel for Supplementary Figure. 2A

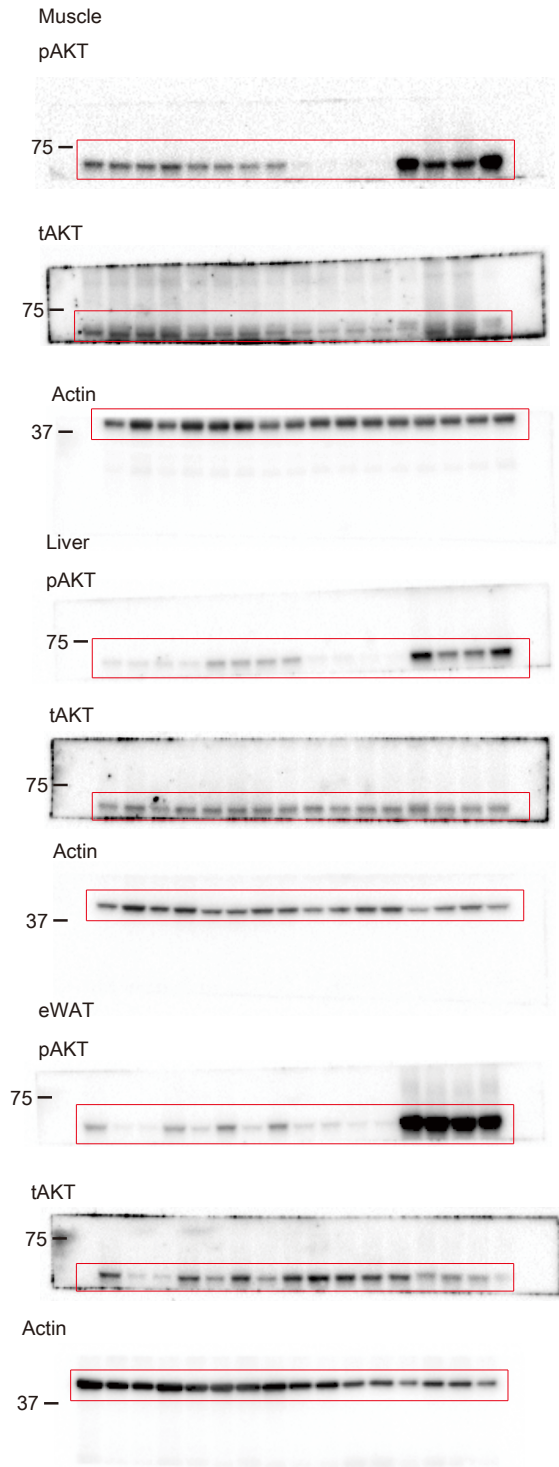

Full unedited gel for Supplementary Figure. 4D

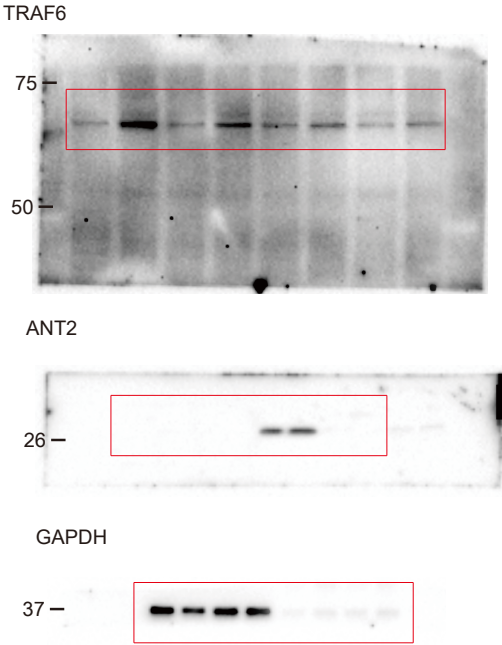

Full unedited gel for Supplementary Figure. 6C

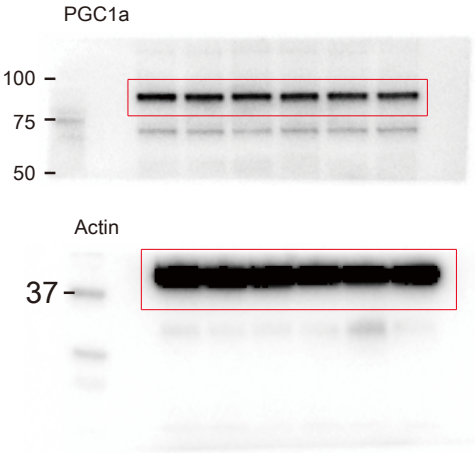

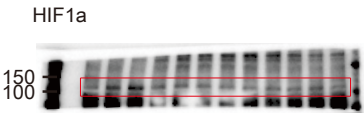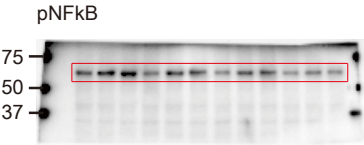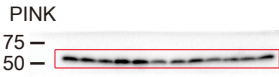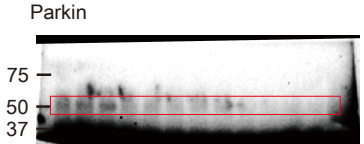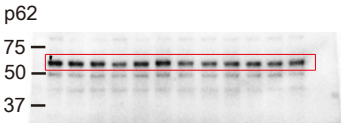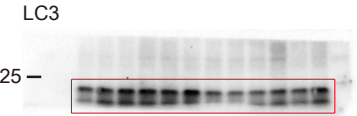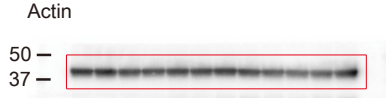

Full unedited gel for Supplementary Figure. 8D

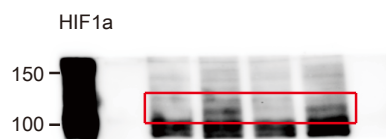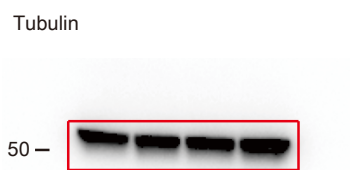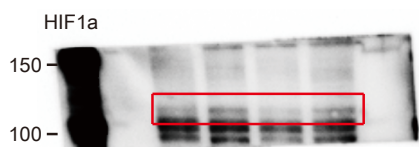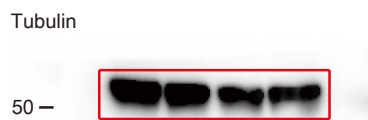

Supplement: jciinsight-6-147033-s039.pdf [file jciinsight-6-147033-s039.pdf]
